# Supplementary material
Source: publisher figshare collection journal article supplement (https://gsajournals.figshare.com/ndownloader/files/28002702)
Supplement: Supplementary file 1 [file 28002702]

## Sheet: TableS1_Plant_Accession
Table S1: Information for 84 accessions of seven crop species. The accession ID corresponds to the germplast collections (the U.S. Department of Agriculture Germplasm Resources Information Network [USDA Grin], the Centre for Genetic resources in the Netherland [CGN], UC Davis Tomato Genetic Resource Center [TGRC]). Information on the species and subspecies, Taxon, order, clade, improvement status…
Germplasm ID	Other ID	Germplast Bank	Full species name	Taxon	Order	Clade	Improvement	Domestication	Cultivar name	Origin (Country)	Latitude	Longitude
PI.347594		USDA Grin	Brassica rapa subsp. dichotoma	B.rapa	Brassicales	Rosids	high	Domesticated		Lucknow (India)	26.8467	80.9462
PI.508409		USDA Grin	Brassica rapa subsp. Chinensis	B.rapa	Brassicales	Rosids	high	Domesticated		Seoul (South Korea)	37.5665	126.978
PI.633169		USDA Grin	Brassica rapa L. subsp. oleifera (DC.) Metzg.	B.rapa	Brassicales	Rosids	high	Domesticated	Field mustard	Isla de la Juventud (Cuba)	21.7085	-82.822
PI.649204		USDA Grin	Brassica rapa L. subsp. trilocularis (Roxb.) Hanelt	B.rapa	Brassicales	Rosids	high	Domesticated	Yellow sarson - field mustard	Iowa (USA)	42.0308	-93.6319
PI.662686		USDA Grin	Brassica rapa L. subsp. rapa	B.rapa	Brassicales	Rosids	high	Domesticated	Turnip 60 Days	Taiwan	23.6978	120.96
PI.662783		USDA Grin	Brassica rapa var. parachinensis	B.rapa	Brassicales	Rosids	high	Domesticated		Sumatra (Indonesia)	-0.5897	101.343
PI.234600		USDA Grin	Brassica rapa subsp. pekinensis	B.rapa	Brassicales	Rosids	low	Landrace	Napa cabbage	Sydney (Australia)	-33.8688	151.209
PI.597831		USDA Grin	Brassica rapa subsp. oleifera	B.rapa	Brassicales	Rosids	low	Wild	Field mustard	Alexandria (Egypt)	31.2001	29.9187
PI.633181		USDA Grin	Brassica rapa L. subsp. rapa	B.rapa	Brassicales	Rosids	low	Wild		Lempira (Honduras)	14.1888	-88.5565
GC 1742-69		Chris Piers (U. Missouri)	B. rapa sylvestris	B.rapa	Brassicales	Rosids	low	Wild
GC 4623-77		Chris Piers (U. Missouri)	B. rapa sylvestris	B.rapa	Brassicales	Rosids	low	Wild
R500		Chris Piers (U. Missouri)	B. rapa	B.rapa	Brassicales	Rosids	Low	Landrace
PI.393808		USDA Grin	Cichorium endivia L.	C.endivia	Asterales	Asterids	high	Domesticated	Cornet de Bordeaux	France	44.8378	0.5792
PI.393811		USDA Grin	Cichorium endivia L.	C.endivia	Asterales	Asterids	high	Domesticated	Grosse Pancaliere	France	48.8566	2.3522
PI.503585		USDA Grin	Cichorium endivia	C.endivia	Asterales	Asterids	high	Domesticated		Montalbano Ionoco (Italy)	40.6431	15.97
PI.651905		USDA Grin	Cichorium endivia	C.endivia	Asterales	Asterids	high	Domesticated	Sluis & Groot 34A	North Holland (Netherland)	52.5206	4.7885
PI.651906		USDA Grin	Cichorium endivia	C.endivia	Asterales	Asterids	high	Domesticated	Sluis & Groot 8452	North Holland (Netherland)	52.5206	4.7885
PI.651915		USDA Grin	Cichorium endivia	C.endivia	Asterales	Asterids	high	Domesticated	Breedblad Volhart Winter	Limburg (Netherland)	51.4427	6.0609
PI.273578		USDA Grin	Cichorium endivia subsp. pumilum	C.endivia	Asterales	Asterids	low	Landrace		Palermo (Italy)	38.1157	13.3613
PI.652010		USDA Grin	Cichorium endivia L.	C.endivia	Asterales	Asterids	low	Landrace	Endive full, "schiana"	Italy	41.9028	12.4964
PI.652011		USDA Grin	Cichorium endivia L.	C.endivia	Asterales	Asterids	low	Landrace	Curled endive "Santantuno	Sant'Antimo (Italy)	40.942	14.2309
PI.652013		USDA Grin	Cichorium endivia L.	C.endivia	Asterales	Asterids	low	Landrace	Middle-leaf endive	Naples (Italy)	40.8333	14.25
PI.652014		USDA Grin	Cichorium endivia L.	C.endivia	Asterales	Asterids	low	Landrace	Curled, green endive, winter's end	Italy	41.9028	12.4964
PI.652049		USDA Grin	Cichorium endivia	C.endivia	Asterales	Asterids	low	Landrace		Aleppo (Syria)	36.1992	37.1528
PI.651886		USDA Grin	Cichorium intybus L.	C.intybus	Asterales	Asterids	high	Domesticated	'Augusto'	North (Netherland)	52.5206	4.7885
PI.651945		USDA Grin	Cichorium intybus L.	C.intybus	Asterales	Asterids	high	Domesticated	Fritardif	North Holland (Netherland)	52.5206	4.7885
PI.651971		USDA Grin	Cichorium intybus L.	C.intybus	Asterales	Asterids	high	Domesticated	Philvo	Limburg (Netherland)	51.4427	6.0609
PI.652038		USDA Grin	Cichorium intybus L.	C.intybus	Asterales	Asterids	high	Domesticated	Rossa di Verona Precoce-Toga	Veneto (Italy)	45.7623	11.691
PI.652041		USDA Grin	Cichorium intybus L.	C.intybus	Asterales	Asterids	high	Domesticated	Cicoria Bianca di Milano	Trentino (Italy)	46.0512	11.1175
PI.652045		USDA Grin	Cichorium intybus L.	C.intybus	Asterales	Asterids	high	Domesticated	Cicoria Puntarelle a Foglia Frastagliata	Trentino (Italy)	46.0512	11.1175
PI.652006		USDA Grin	Cichorium intybus L.	C.intybus	Asterales	Asterids	low	Wild		Zangenberg (Germany)	51.0667	12.15
PI.652008		USDA Grin	Cichorium intybus L.	C.intybus	Asterales	Asterids	low	Wild		Suwalki (Poland)	53.7333	22.75
PI.652019		USDA Grin	Cichorium intybus L.	C.intybus	Asterales	Asterids	low	Wild		Neuchatel (Switzerland)	47.0577	6.7487
PI.652021		USDA Grin	Cichorium intybus L.	C.intybus	Asterales	Asterids	low	Wild		Bekes (Hungary)	46.7711	21.129
PI.652026		USDA Grin	Cichorium intybus L.	C.intybus	Asterales	Asterids	low	Wild		Mazandaran (Iran)	36.4226	51.4296
PI.652028		USDA Grin	Cichorium intybus L.	C.intybus	Asterales	Asterids	low	Wild		Krasnodar (Russia)	45.0328	35.9769
CL0J173-6-8	PI.643395		Glycine max (L.) Merr.	G.max	Fabales	Rosids	high	Domesticated	CL0J173-6-8	Indiana (USA)	40.2672	-86.1349
LD02-4485			Glycine max	G.max	Fabales	Rosids	high	Domesticated			40.6331	-89.3985
LG04-4717			Glycine max	G.max	Fabales	Rosids	high	Domesticated			40.6331	-89.3985
LG05-4832			Glycine max	G.max	Fabales	Rosids	high	Domesticated			40.6331	-89.3985
LG98-1605			Glycine max	G.max	Fabales	Rosids	high	Domesticated			40.6331	-89.3985
NE3001			Glycine max	G.max	Fabales	Rosids	high	Domesticated			40.6331	-89.3985
PI.398881		USDA Grin	Glycine max (L.) Merr.	G.max	Fabales	Rosids	low	Wild		Kyonggi (South Korea)	37	127
PI.404188A		USDA Grin	Glycine max (L.) Merr.	G.max	Fabales	Rosids	low	Wild		Chuaj-an'-si-er-djan (China)	39.9042	116.407
PI.427.136		USDA Grin	Glycine max (L.) Merr.	G.max	Fabales	Rosids	low	Wild		Kyonggi (South Korea)	37.4138	127.518
PI.437.169B		USDA Grin	Glycine max (L.) Merr.	G.max	Fabales	Rosids	low	Wild		Krasnodar (Russia)	45.1035	39.2703
PI.507681B		USDA Grin	Glycine max (L.) Merr.	G.max	Fabales	Rosids	low	Wild		Jangiabad (Uzbekistan)	41.2995	69.2401
PI.518751		USDA Grin	Glycine max (L.) Merr.	G.max	Fabales	Rosids	low	Wild		Serbia/Montenegro	43.1407	20.5214
PI.599764		USDA Grin	Helianthus annuus L.	H.annuus	Asterales	Asterids	high	Domesticated	RHA 294	North Dakota (USA)	46.8772	-96.7898
PI.599782		USDA Grin	Helianthus annuus L.	H.annuus	Asterales	Asterids	high	Domesticated	HA 304	North Dakota (USA)	46.8772	-96.7898
PI.633747		USDA Grin	Helianthus annuus L.	H.annuus	Asterales	Asterids	high	Domesticated	RHA 437	North Dakota (USA)	46.8772	-96.7898
PI.642777		USDA Grin	Helianthus annuus L.	H.annuus	Asterales	Asterids	high	Domesticated	HA 412	North Dakota (USA)	46.8772	-96.7898
PI.664207		USDA Grin	Helianthus annuus L.	H.annuus	Asterales	Asterids	high	Domesticated	RHA 333	North Dakota (USA)	46.8772	-96.7898
PI.667183		USDA Grin	Helianthus annuus L.	H.annuus	Asterales	Asterids	high	Domesticated	HA 466	North Dakota (USA)	46.8772	-96.7898
PI.413153		USDA Grin	Helianthus annuus L.	H.annuus	Asterales	Asterids	low	Wild		Arizona (USA)	31.9678	-110.294
PI.435584		USDA Grin	Helianthus annuus L.	H.annuus	Asterales	Asterids	low	Wild		California (USA)	41.4833	-120.533
PI.468627		USDA Grin	Helianthus annuus L.	H.annuus	Asterales	Asterids	low	Wild		Colorado (USA)	37.4667	-105.883
PI.597899		USDA Grin	Helianthus annuus L.	H.annuus	Asterales	Asterids	low	Wild		South Dakota (USA)	42.8167	-96.6944
PI.649853		USDA Grin	Helianthus annuus L.	H.annuus	Asterales	Asterids	low	Wild		Ohio (USA)	39.1711	-84.4997
PI.664809		USDA Grin	Helianthus annuus L.	H.annuus	Asterales	Asterids	low	Wild	Eubank 2	Mississipi (USA)	33.5521	-91.1062
LJ10318	LJ 09002	CGN	Lactuca sativa	Lactuca	Asterales	Asterids	high	Domesticated	Iceberg
LJ10320	HRIGRU002492	CGN	Lactuca sativa	Lactuca	Asterales	Asterids	high	Domesticated	Stoke	UK	52.3792	-1.56135
LJ10326	HRIGRU001206	CGN	Lactuca sativa	Lactuca	Asterales	Asterids	high	Domesticated	Bloody Warrior	UK	52.3792	-1.56135
LJ10332	HRIGRU013825	CGN	Lactuca sativa	Lactuca	Asterales	Asterids	high	Domesticated	Adriatica2	Bulgaria	42.4916	25.2945
LJ10335	HRIGRU004480	CGN	Lactuca sativa	Lactuca	Asterales	Asterids	high	Domesticated	Chinese Stem	China	36.3182	103.656
LJ14005	LJ 09001	CGN	Lactuca sativa	Lactuca	Asterales	Asterids	high	Domesticated	Saladin
LJ10400	CGN05804	CGN	Lactuca serriola	Lactuca	Asterales	Asterids	low	Wild	84	Switzerland	46	8.867
LJ10405	CGN22054	CGN	Lactuca serriola	Lactuca	Asterales	Asterids	low	Wild	89	Kyrgyzstan	41.4329	75.2418
LJ10409	CGN9308	CGN	Lactuca serriola	Lactuca	Asterales	Asterids	low	Wild	93	France	43.81	2.883
LJ14025	CGN15737	CGN	Lactuca serriola	Lactuca	Asterales	Asterids	low	Wild	87	Georgia	41.78	45.25
LJ14033	CGN15684	CGN	Lactuca serriola	Lactuca	Asterales	Asterids	low	Wild	91	Turkey	36.25	36.25
LJ14038	CGN05152	CGN	Lactuca serriola	Lactuca	Asterales	Asterids	low	Wild	94	Poland	51.92	19.137
LA2706		UC Davis TGRC	Solanum lycopersicum	Solanum	Solanales	Asterids	high	Domesticated	Moneymaker	England	52.7014	-1.13742
LA3008		UC Davis TGRC	Solanum lycopersicum	Solanum	Solanales	Asterids	high	Domesticated	San Marzano	Italy	42.6771	13.2461
LA3475		UC Davis TGRC	Solanum lycopersicum	Solanum	Solanales	Asterids	high	Domesticated	M-82	California- UC Davis	38.5382	-121.762
LA0410		UC Davis TGRC	Solanum lycopersicum	Solanum	Solanales	Asterids	high	Domesticated		Guayaquil (Ecuador)	-2.17008	-79.9201
LA4345		UC Davis TGRC	Solanum lycopersicum	Solanum	Solanales	Asterids	high	Domesticated	Heinz 1706-BG	California- UC Davis	40.1939	-82.7926
LA4355		UC Davis TGRC	Solanum lycopersicum	Solanum	Solanales	Asterids	high	Domesticated	Gold Nugget	California- UC Davis	43.5971	-120.76
LA1547		UC Davis TGRC	Solanum pimpinellifolium L.	Solanum	Solanales	Asterids	low	Wild		El Angel (Ecuador)	0.583333	-77.9333
LA1589		UC Davis TGRC	Solanum pimpinellifolium L.	Solanum	Solanales	Asterids	low	Wild		Galunga (Peru)	-8.39	-78.74
LA1684		UC Davis TGRC	Solanum pimpinellifolium L.	Solanum	Solanales	Asterids	low	Wild		Piura (Peru)	-5.09672	-80.1667
LA2093		UC Davis TGRC	Solanum pimpinellifolium L.	Solanum	Solanales	Asterids	low	Wild		La Union (Ecuador)	-3.62806	-79.8881
LA2176		UC Davis TGRC	Solanum pimpinellifolium L.	Solanum	Solanales	Asterids	low	Wild		Timbaruca (Peru)	-5.14167	-79.0083
LA0480		UC Davis TGRC	Solanum pimpinellifolium L.	Solanum	Solanales	Asterids	low	Wild		Hacienda Santa Inez (Peru)	-11.2333	-77.4
